# Supplementary material for: Oocyst Shedding Dynamics in Children with Cryptosporidiosis: a Prospective Clinical Case Series in Ethiopia
Source: PubMed Central journal article supplement (PMC9430463; doi:10.1128/spectrum.02741-21), 2022-06-14

**Figure S1. *Cryptosporidium* shedding over time, results for individual participants.**

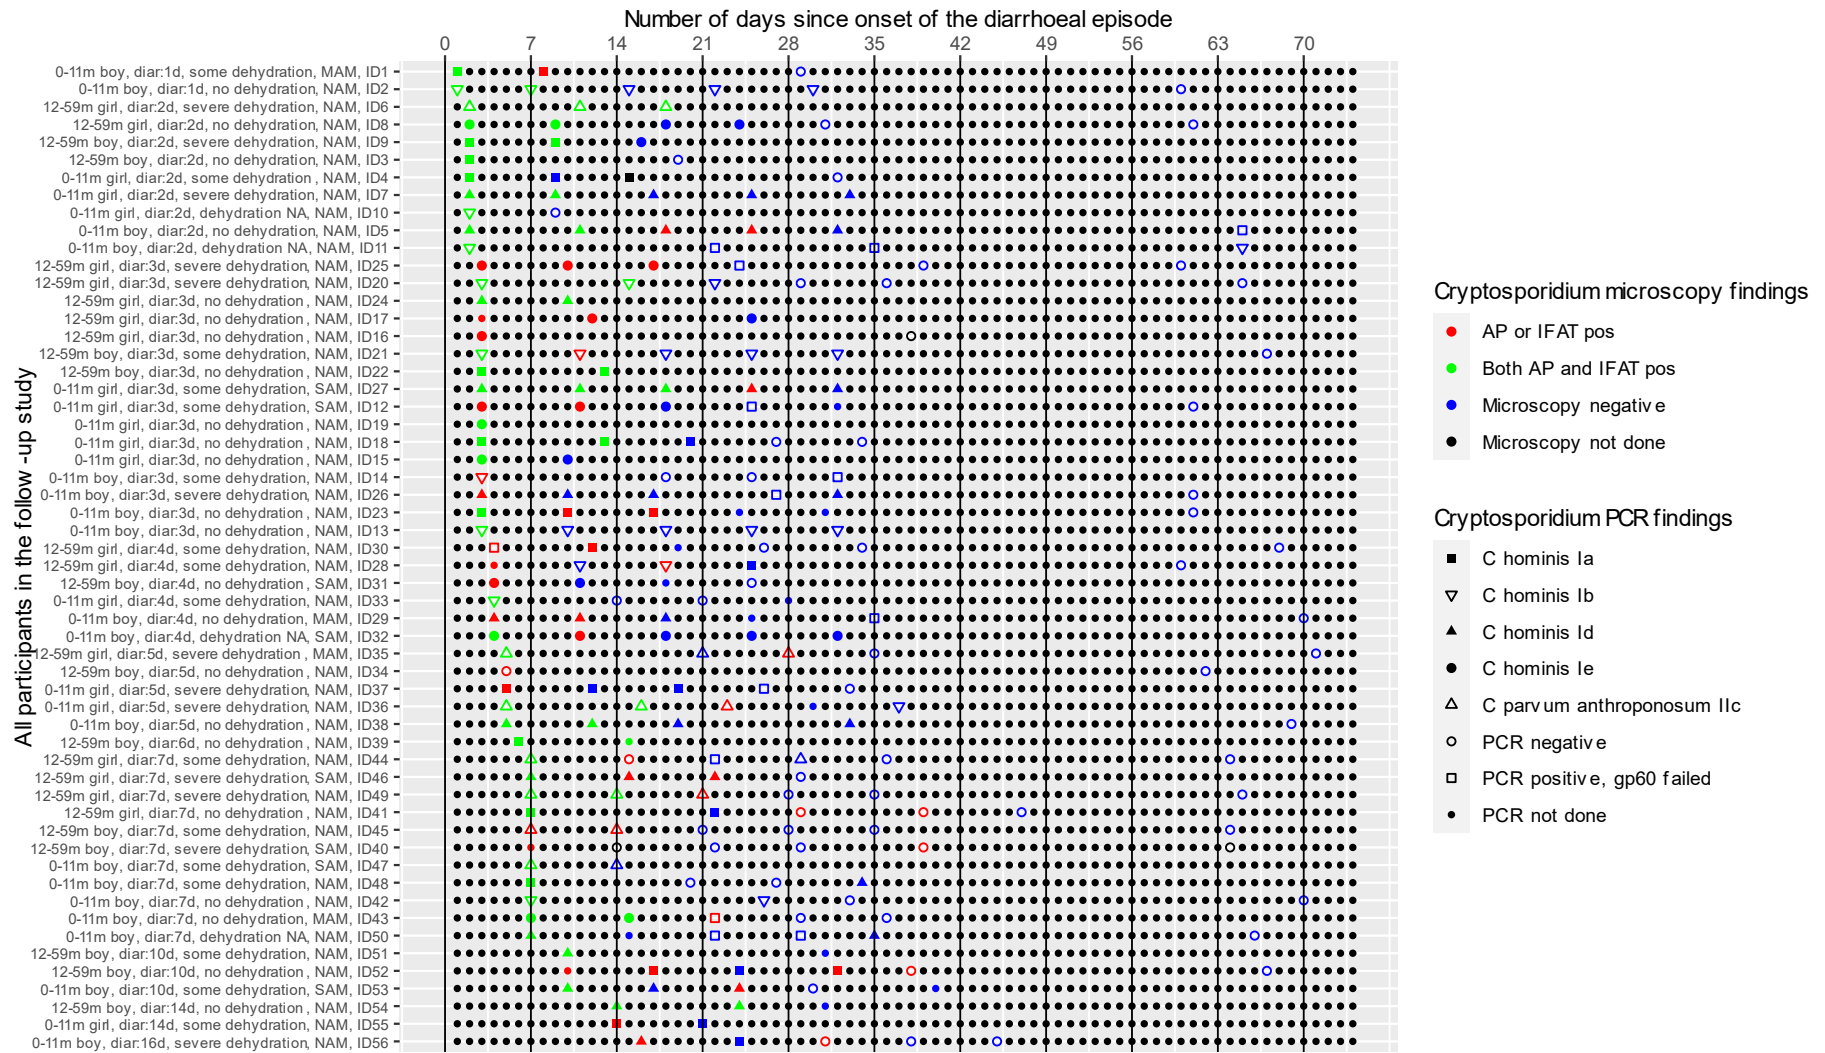

**Note:** For *Cryptosporidium* qPCR quantity and subtyping results, see **Supplementary dataset**.

## Figure S2. Visual comparison and selection of time-to-event parametric models

The time-to-event graphs in Figure 1 in the main manuscript represent the aggregate interval-censored time-to-event data, overall, and stratified by subgroups. The graphs are based on the non-parametric maximum likelihood estimator (NPLME; the Turnbull estimator) and resembles a Kaplan Meier plot but is extended to allow for interval censored data. To our knowledge, there are no well-established methods to obtain confidence intervals for time-to-event duration estimates, using non-parametric or semi-parametric models. We therefore fitted several parametric models. Parametric models have the added advantage that we were able to adjust for the (a priori-assumed confounding factors of) age and sex. As there are no generally approved formal methods for choosing between time-to-event parametric models for interval censored data, we used the `diag_baseline` function from the `icenReg` R package [1] to compare various parametric models visually, with a semi-parametric Turnbull model as a baseline for assessing model fit; all models were adjusted for sex and age (in months):

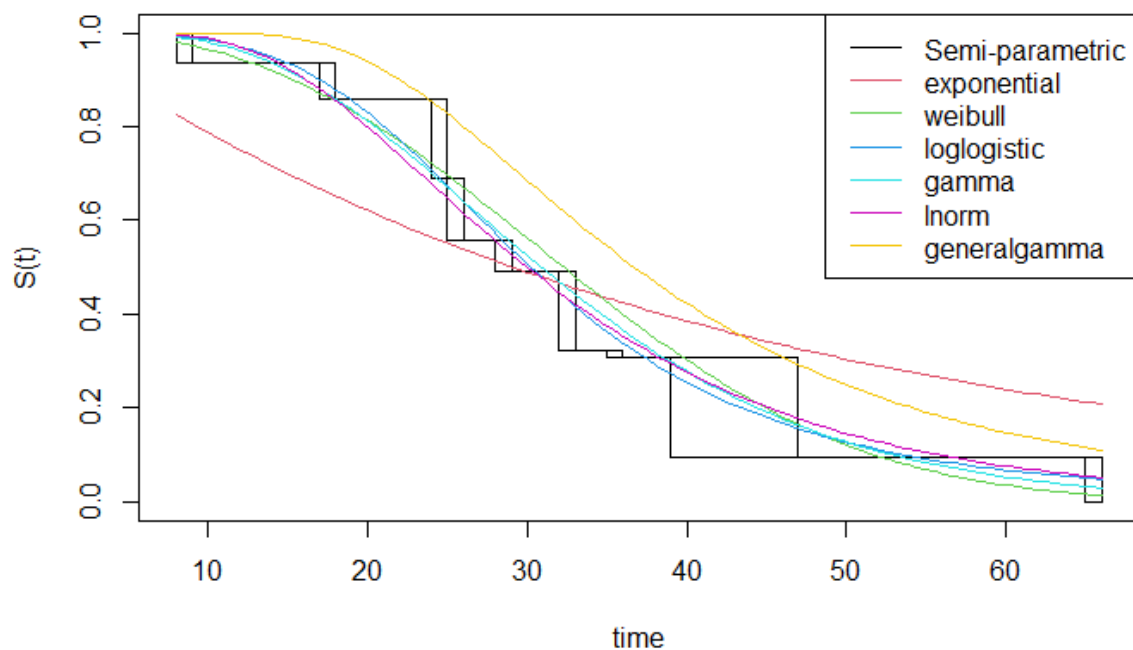

Although visual diagnostics are somewhat subjective, we see that most of the the parametric distributions show no systematic deviation from the semi-parametric baseline model, with the notable exception of the exponential and generalized gamma distributions. This implies that various parametric model families may do a reasonable job of describing the underlying distribution. We opted for the commonly used log-logistic model, which allowed us to estimate median shedding duration with 95% confidence intervals and, also, to compare time-to-event curves between key subgroups of children by estimation of the odds ratio (also with 95% confidence intervals).

1. Anderson-Bergman C. `icenReg`: regression models for interval censored data in R. *Journal of Statistical Software*. 2017;81(1):1-23.

**Supplementary table S1. Estimated *Cryptosporidium* quantity over time.** Estimated by the overall generalized additive mixed model.

| <b>Weeks since onset of diarrhoea</b> | <b><i>Cryptosporidium</i> DNA quantity (log10 copies/g)</b> | <b>95% confidence interval</b> |
|---------------------------------------|-------------------------------------------------------------|--------------------------------|
| 0                                     | 7.7                                                         | 6.6 to 8.7                     |
| 1                                     | 6.6                                                         | 5.6 to 7.6                     |
| 2                                     | 5.5                                                         | 4.5 to 6.5                     |
| 3                                     | 4.5                                                         | 3.5 to 5.5                     |
| 4                                     | 3.6                                                         | 2.6 to 4.6                     |
| 5                                     | 2.8                                                         | 1.8 to 3.8                     |
| 6                                     | 2.2                                                         | 1.2 to 3.2                     |
| 7                                     | 1.6                                                         | 0.58 to 2.7                    |
| 8                                     | 1.2                                                         | 0.02 to 2.3                    |

Figure S3. Plot of difference in shedding quantity over time, compared between subgroups.

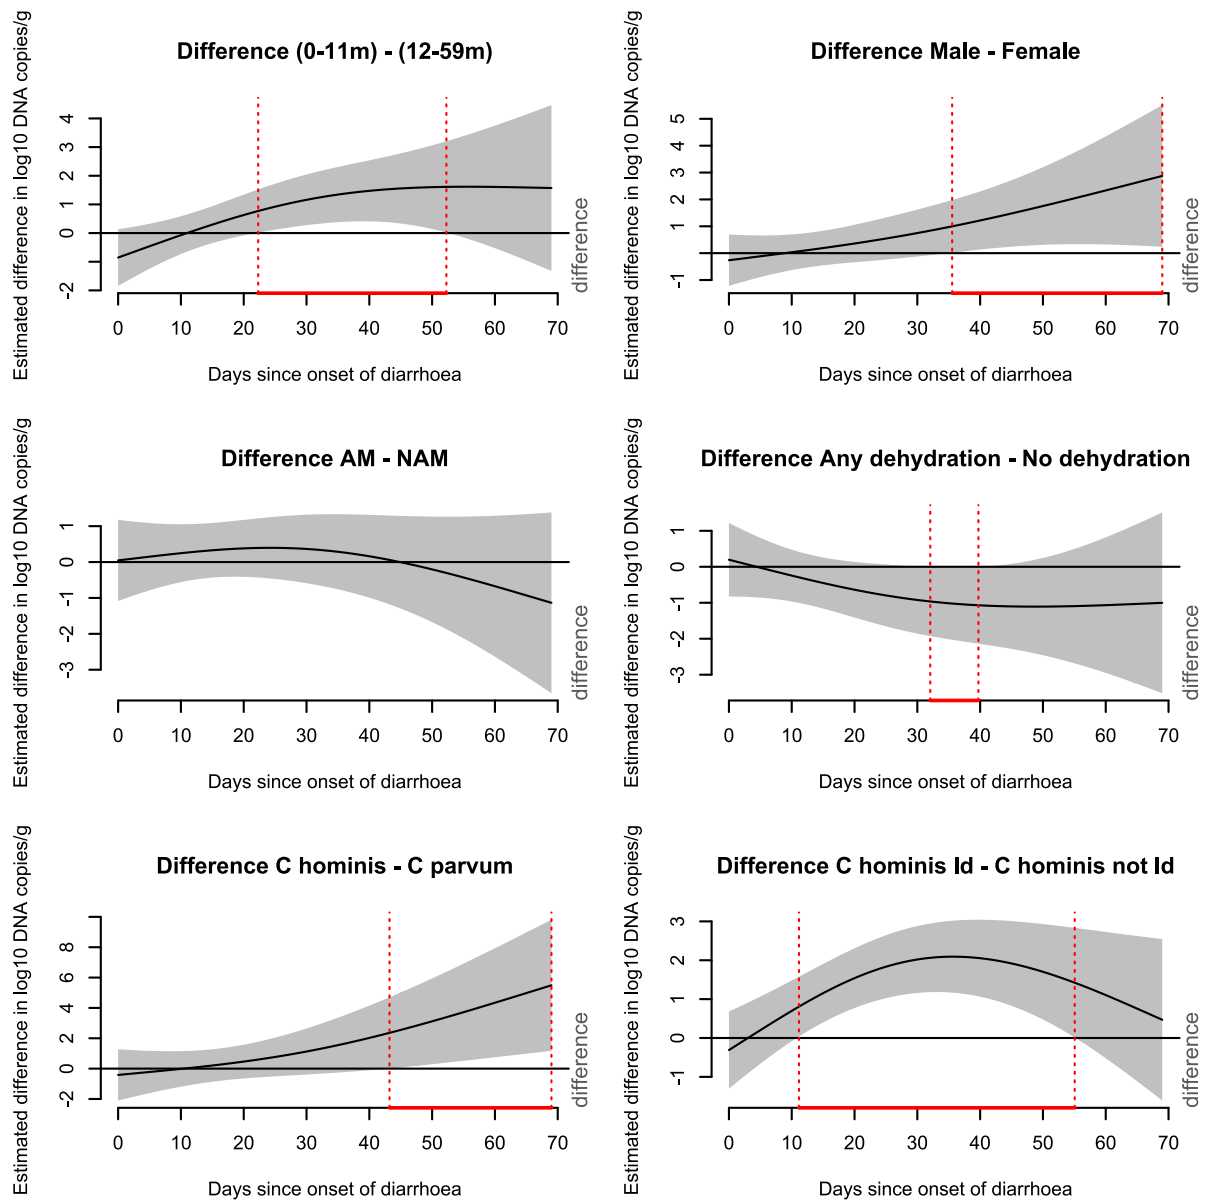

Note: These plots were made with the plot\_diff function from the R package itsadug (<https://CRAN.R-project.org/package=itsadug>)

**Figure S4. Plot of GAMM model used to predict shedding duration from overall drop in *Cryptosporidium* DNA quantity over time.** Vertical dashed line represents the detection limit of the qPCR assay, and the green shaded ribbon represents the 95% confidence interval for the model predicted days since onset of diarrhoea.

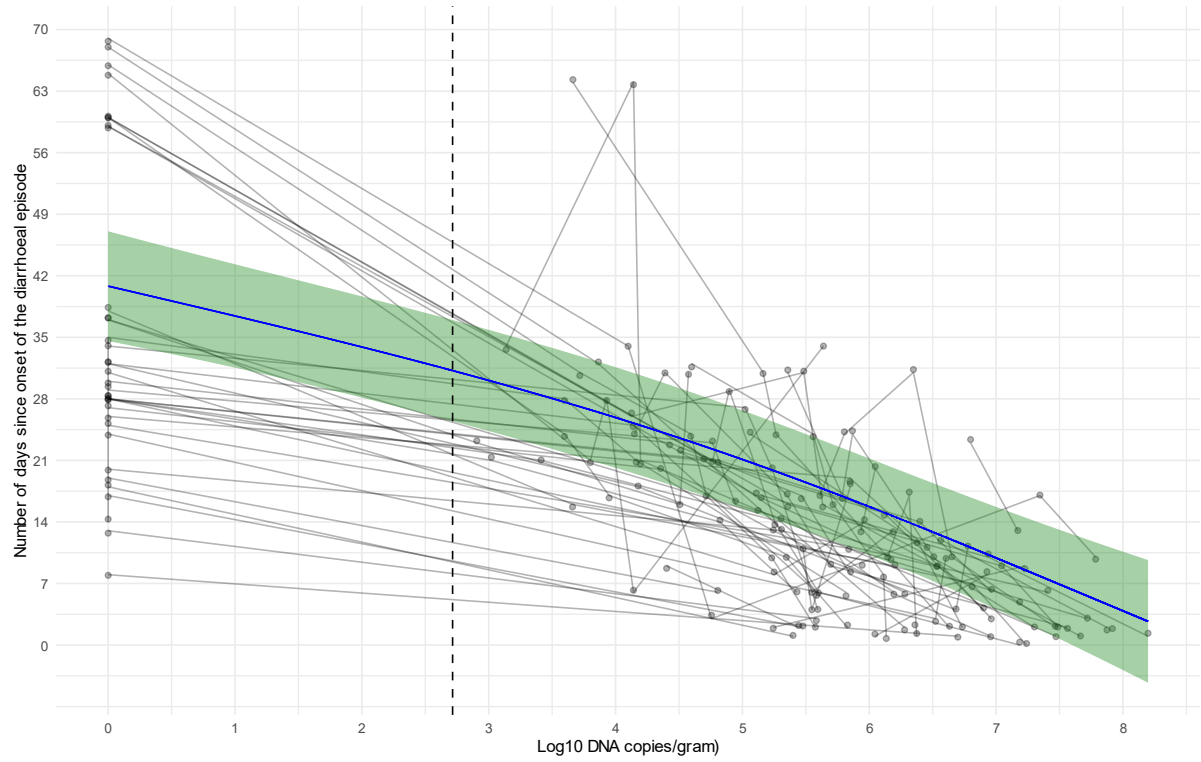

Supplement: spectrum.02741-21-s0002.pdf [file spectrum.02741-21-s0002.pdf]
